# Supplementary material for: Circulating levels of specific members of chromosome 19 microRNA cluster are associated with preeclampsia development
Source: Springer Nature journal article supplement (doi:10.1007/s00404-017-4611-6), 2017-11-30
Supplement: MOESM1 [file 15271740]

**Electronic Supplementary Material**

**Online Resource 1 –** List of C19MC members evaluated in the study

**Online Resource 2 -** Comparison of the clinical data between the study groups at the three follow-up time points.

**- Electronic Supplementary Material –**

**Circulating levels of specific members of chromosome 19 microRNA cluster are associated with preeclampsia development**

Margarita L Martinez-Fierro1*, Idalia Garza-Veloz1, Cristina Gutierrez-Arteaga1, Ivan Delgado-Enciso2, Olga Y Barbosa-Cisneros3, Virginia Flores-Morales4, Gloria P Hernandez-Delgadillo5, Maria R Rocha-Pizaña6, Iram P Rodriguez-Sanchez7, Jose I Badillo-Almaraz1, Jose M Ortiz-Rodriguez8, Rodrigo Castañeda-Miranda8, Luis O Solis-Sanchez8, and Yolanda Ortiz-Castro1

1 Molecular Medicine Laboratory, Unidad Academica de Medicina Humana y Ciencias de la Salud. Universidad Autonoma de Zacatecas. Zacatecas, Mexico.

2 School of Medicine, University of Colima. Colima, Mexico

3 Laboratory of Cell and Molecular Biology, Unidad Academica de Ciencias Quimicas. Universidad Autonoma de Zacatecas. Zacatecas, Mexico.

4 Laboratorio de Sintesis Asimetrica y Bioenergetica (LSAyB), Universidad Autonoma de Zacatecas. Zacatecas, Mexico.

5 Laboratorio de Investigación en Farmacología, Universidad Autonoma de Zacatecas. Zacatecas, Mexico.

6 Centro de Biotecnologia-FEMSA, Tecnologico de Monterrey. Monterrey, Mexico.

7Department of Genetics, School of Medicine, Nuevo Leon Autonomous University, Monterrey, Nuevo Leon, Mexico.

8Bioenginnering Laboratory, Unidad Academica de Ingenieria Electrica, Universidad Autonoma de Zacatecas, Zacatecas, México.

*To whom the correspondence should be addressed.

Margarita L Martinez-Fierro, DSc.

Unidad Academica de Medicina Humana y Ciencias de la Salud.

Universidad Autonoma de Zacatecas.

Carretera Zacatecas-Guadalajara Km.6, Ejido la Escondida, CP 98160, Zacatecas, Mexico.

Telephone: +52(492)9256690 Ext/Fax number:4511.

E-mail: [margaritamf@uaz.edu.mx](mailto:margaritamf@uaz.edu.mx)

**Online Resource 1 – List of C19MC members evaluated in the study**

| hsa-miR-526b | hsa-miR-518e |
| --- | --- |
| hsa-miR-525-3p | hsa-miR-518e# |
| hsa-miR-525 | hsa-miR-518d-5p |
| hsa-miR-524-5p | hsa-miR-518d |
| hsa-miR-524 | hsa-miR-518c |
| hsa-miR-523 | hsa-miR-518c# |
| hsa-miR-522 | hsa-miR-518b |
| hsa-miR-521 | hsa-miR-518a-5p |
| hsa-miR-520h | hsa-miR-518a-3p |
| hsa-miR-520g | hsa-miR-517c |
| hsa-miR-520f | hsa-miR-517b |
| hsa-miR-520e | hsa-miR-517a |
| hsa-miR-520d-5p | hsa-miR-517# |
| hsa-miR-520c-3p | hsa-miR-516b |
| hsa-miR-520b | hsa-miR-516a-5p |
| hsa-miR-520a | hsa-miR-516-3p |
| hsa-miR-520a# | hsa-miR-515-5p |
| hsa-miR-520d-3p | hsa-miR-515-3p |
| hsa-miR-519e | hsa-miR-513c |
| hsa-miR-519e# | hsa-miR-513b |
| hsa-miR-519d | hsa-miR-513-5p |
| hsa-miR-519c | hsa-miR-512-5p |
| hsa-miR-519b-3p | hsa-miR-512-3p |
| hsa-miR-519a | hsa-miR-1283 |
| hsa-miR-518f | hsa-miR-373 |
| hsa-miR-518f# |  |

| **Online Resource 2. Comparison of the clinical data between the study groups at the three follow-up time points** | | | | | | | | | |
| --- | --- | --- | --- | --- | --- | --- | --- | --- | --- |
| **Clinical finding** | **12 GW** | | ***P* value** | **16GW** | | ***P* value** | **20GW** | | ***P* value** |
| **WWD-PE (n = 6)** | **CONTROLS (n = 18)** | **WWD-PE (n = 10)** | **CONTROLS (n = 18)** | **WWD-PE (n = 14)** | **CONTROLS (n = 18)** |
| Systolic blood pressure (mmHg) | 113.3 ± 10.3 | 101.4 ± 12.3 | 0.052 | 102.2 ± 12.3 | 103.2 ± 10.9 | 0.841 | 102.7 ± 12.2 | 103.6 ± 11.5 | 0.786 |
| Diastolic blood pressure (mmHg) | 63.3 ± 12.1 | 67.7 ± 16.2 | 0.561 | 62.2 ± 14.8 | 69.1 ± 11.1 | 0.215 | 58.7 ± 12.5 | 67.4 ± 10.4 | 0.05 |
|
| Glucose (mg/dl) | 78.0 ± 3.7 | 82.5 ± 9.2 | 0.732 | 82.3 ± 6.9 | 81.1 ± 11.0 | 0.796 | 75.9 ± 9.5 | 81.1 ± 11.0 | 0.223 |
|
| Urine proteins (mg/dl) | NEGATIVE | NEGATIVE | - | NEGATIVE | NEGATIVE | - | NEGATIVE | NEGATIVE | - |
|
| Eritrocytes (x106/µl) | 4.6 ± 0.3 | 4.9 ± 0.6 | 0.286 | 4.4 ± 0.5 | 4.7 ± 0.4 | 0.139 | 4.4 ± 0.2 | 4.5 ± 0.3 | 0.399 |
|
| Hemoglobine (g/dl) | 13.6 ± 1.0 | 14.6 ± 1.0 | 0.071 | 13.0 ± 1.4 | 14.2 ± 0.8 | 0.063 | 13.1 ± 0.7 | 13.6 ± 0.6 | 0.065 |
|
| Leucocyte count (x103/µl) | 8.5 ± 1.7 | 8.7 ± 1.6 | 0.827 | 9.2 ± 1.4 | 9.1 ± 2.1 | 0.898 | 8.8 ± 1.7 | 9.2 ± 1.9 | 0.603 |
|
| Total Cholesterol (mg/dl) | 162.9 ± 49.7 | 180.6 ± 41.2 | 0.407 | 187.8 ± 57.8 | 184.6 ± 35 | 0.869 | 196.2 ± 52.9 | 208 ± 33.5 | 0.395 |
| High Density Lipoprotein (mg/dl) | 62.4 ± 16.4 | 53.7 ± 10.4 | 0.153 | 67.9 ± 10.8 | 60.7 ± 10.7 | 0.142 | 65.7 ± 16.2 | 59.8 ± 10.0 | 0.232 |
| Triglycerides (mg/ml) | 102.1 ±14.7 | 140.0 ± 43.3 | 0.15 | 110.1 ± 18.3 | 139.4 ± 38.6 | 0.057 | 130.6 ± 33.5 | 152.5 ± 28 | 0.057 |
| Data are shown as the mean ± SD | | | | | | | | | |
